# Supplementary material for: Specific and off-target immune responses following COVID-19 vaccination with ChAdOx1-S and BNT162b2 vaccines—an exploratory sub-study of the BRACE trial
Source: PubMed Central journal article supplement (PMC11058726; doi:10.1016/j.ebiom.2024.105100), 2024-04-24

# Supplementary Figure 2

**a**

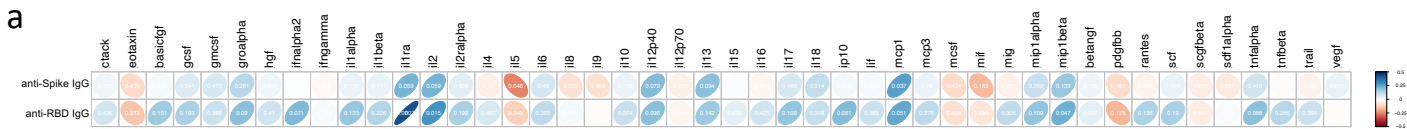

**b**

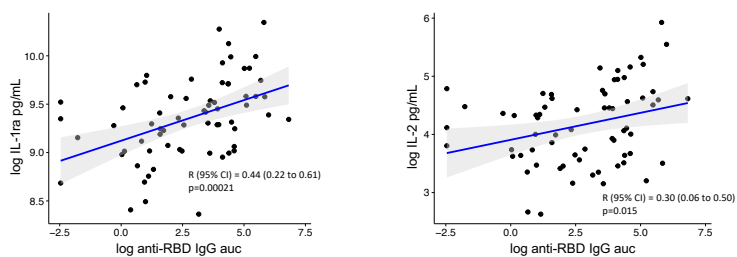

**c**

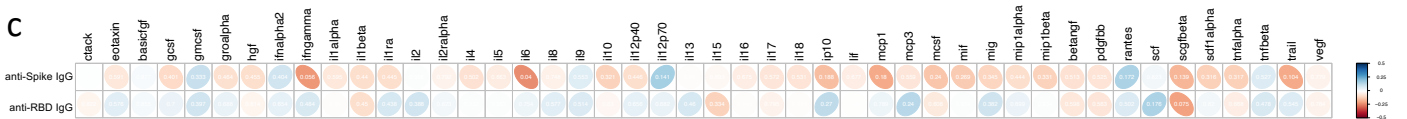

**d**

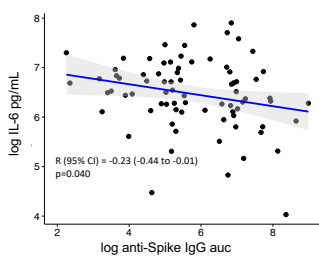

**e**

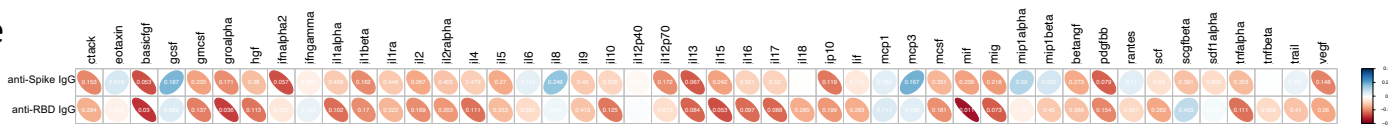

**f**

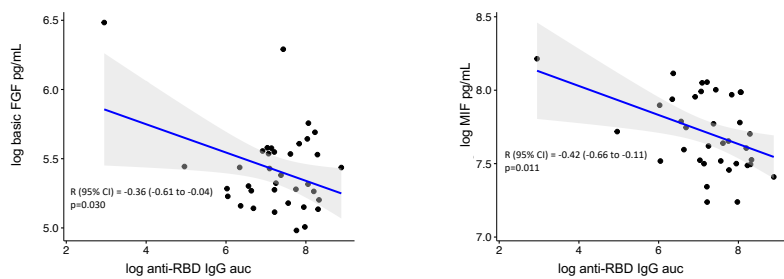

Supplement: mmc4.pdf [file mmc4.pdf]
